# Supplementary material
Source: Springer Nature journal article supplement (https://www.springermedizin.de/resource/supplementary/12985_2011_2206_MOESM3_ESM.pdf/9606292)

**(a)****CXCL11 IN RESPONSE TO PEG-INTRON TREATMENT**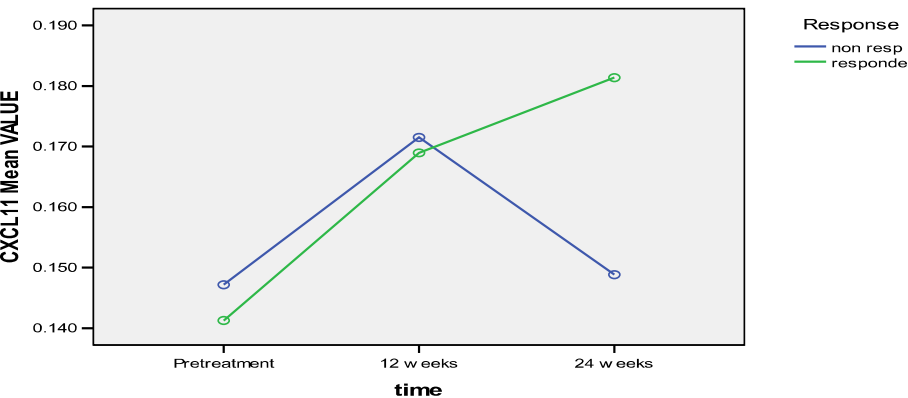**(b)****CXCL11 VALUE IN RESPONSE TO PEGASYS**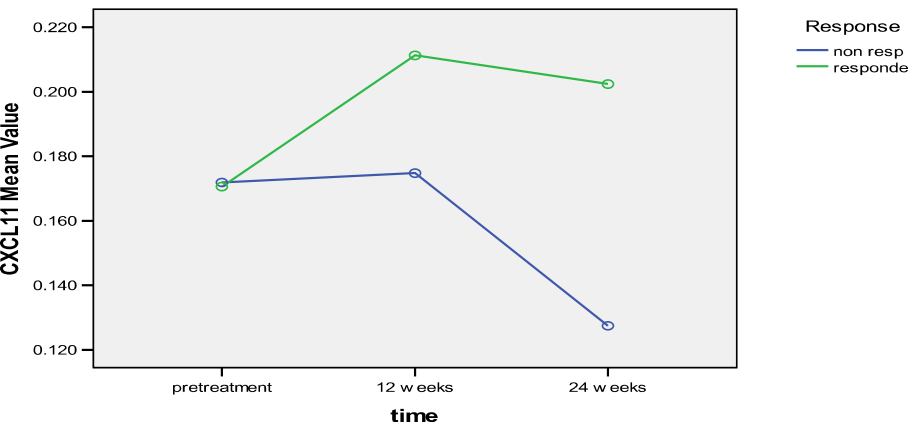

Supplement: MOESM3 [file 9606292]
